# Supplementary material
Source: publisher figshare collection journal article supplement (https://frontiersin.figshare.com/ndownloader/files/13248110)

# Density plots

## Density plots

Here, we show density plots of posterior distributions of parameter values by each model and each dependent variable. Each plot shows smoothed histograms of the parameter values. Horizontal and vertical axis represent values of parameters and proportions of the parameter values, respectively. Labels in the top of each graph indicate each parameter. Plots are displayed by each of four MCMC chains and overlap.

## Results of each model when government effectiveness was used as an independent variable

### Model 1

Labels in the top of each graph represent types of parameter:  $a_0 = a_0$ ,  $GE = GE$ ,  $PS = PS$ , and  $\sigma_y = \sigma_y$ .

### Individualism

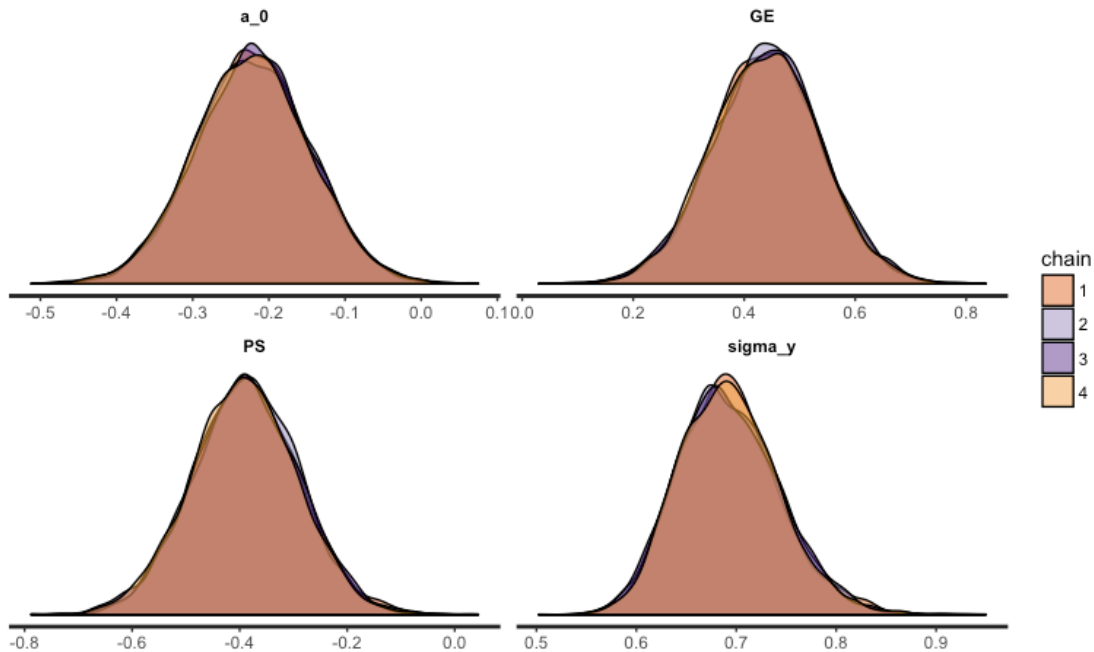

## Conformity 1

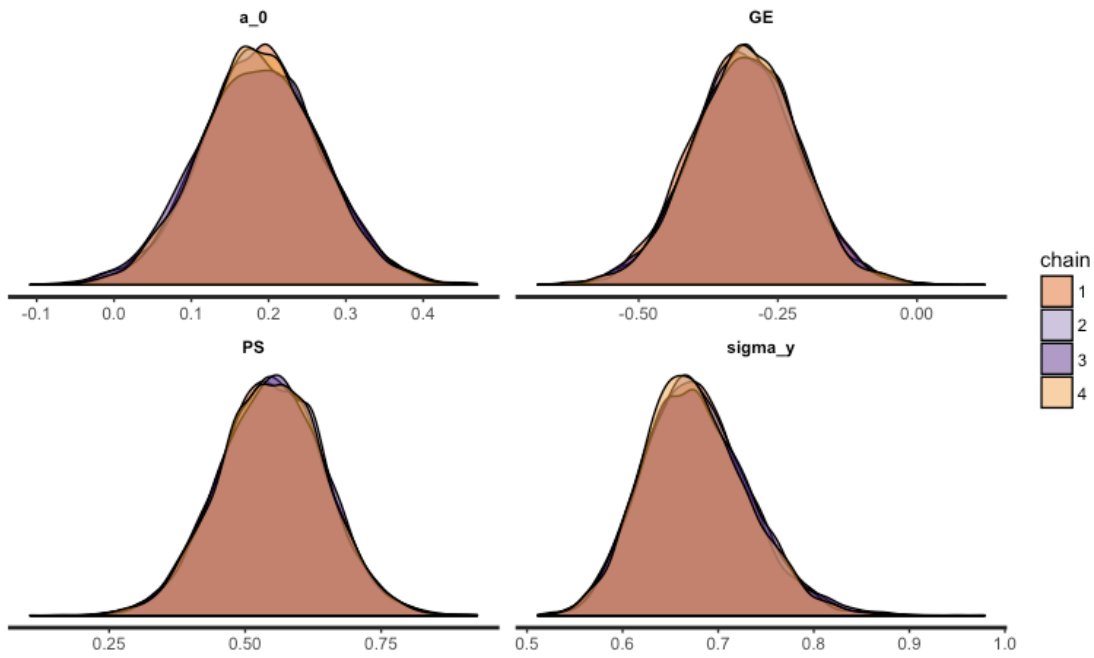

## Conformity 2

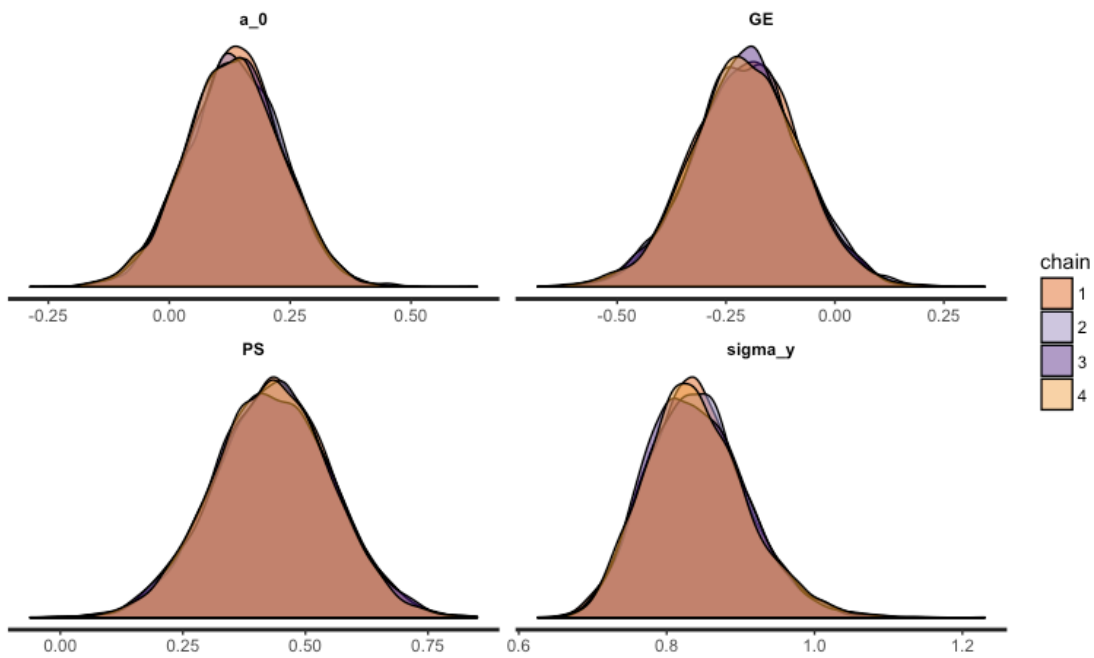

### Conformity 3

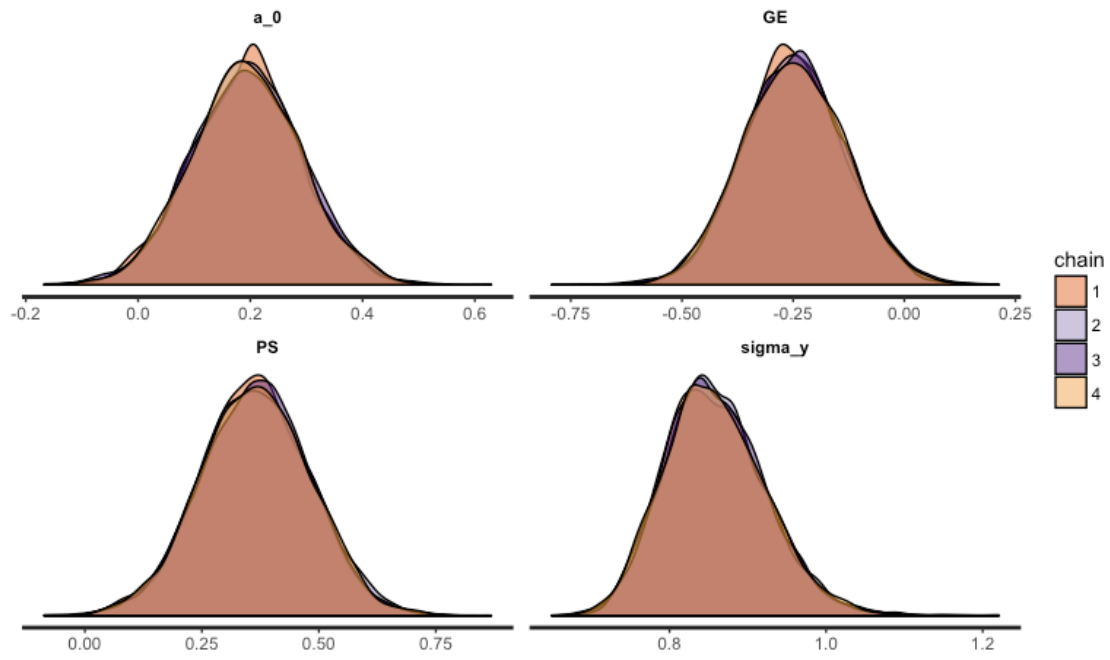

### Conformity 4

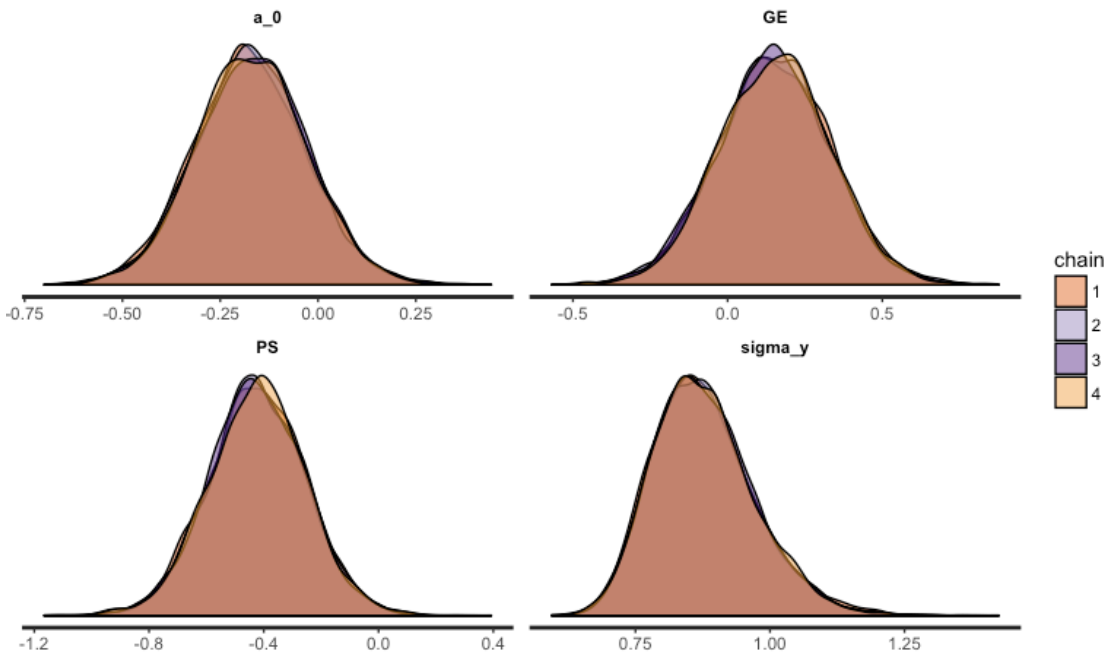

## Model 2

Labels in the top of each graph represent types of parameter:  $\mu_a = \mu_a$ ,  $GE = GE$ ,  $PS = PS$ ,  $a[j] = a_j$ ,  $\sigma_a = \sigma_a$ ,  $\sigma_y = \sigma_y$ . Subscript numbers under  $a$  represent global regions (1: Sub-Saharan Africa, 2 East Asia and Pacific, 3: Europe and Central Asia, 4: Latin America and Caribbean, 5: Middle East and North Africa, and 6: South Asia).

### Individualism

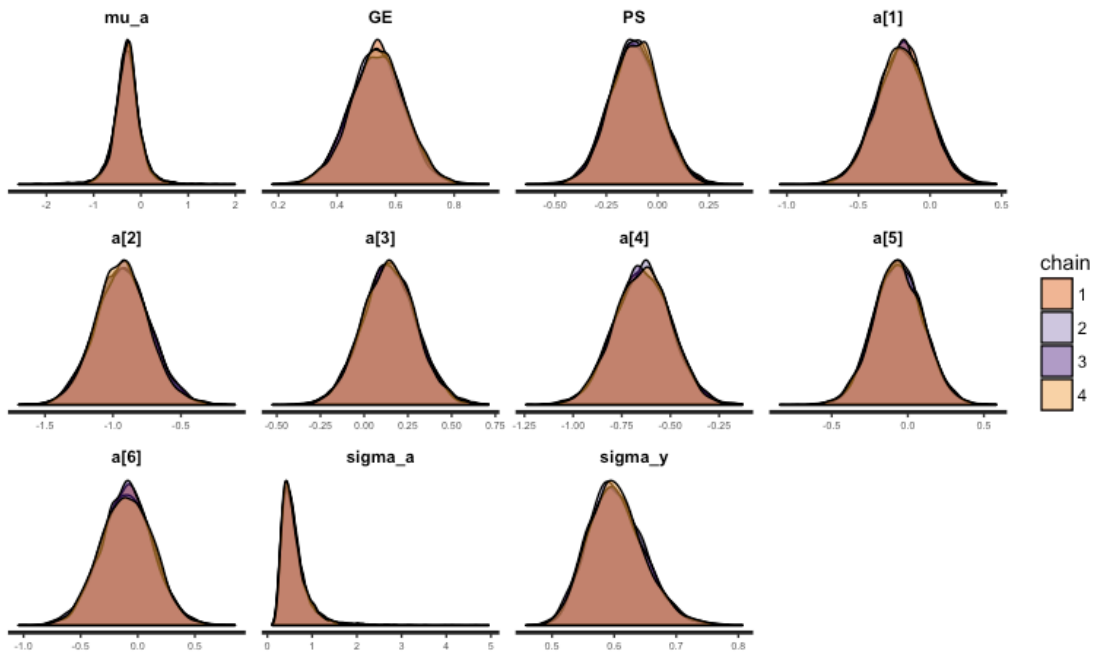

## Conformity 1

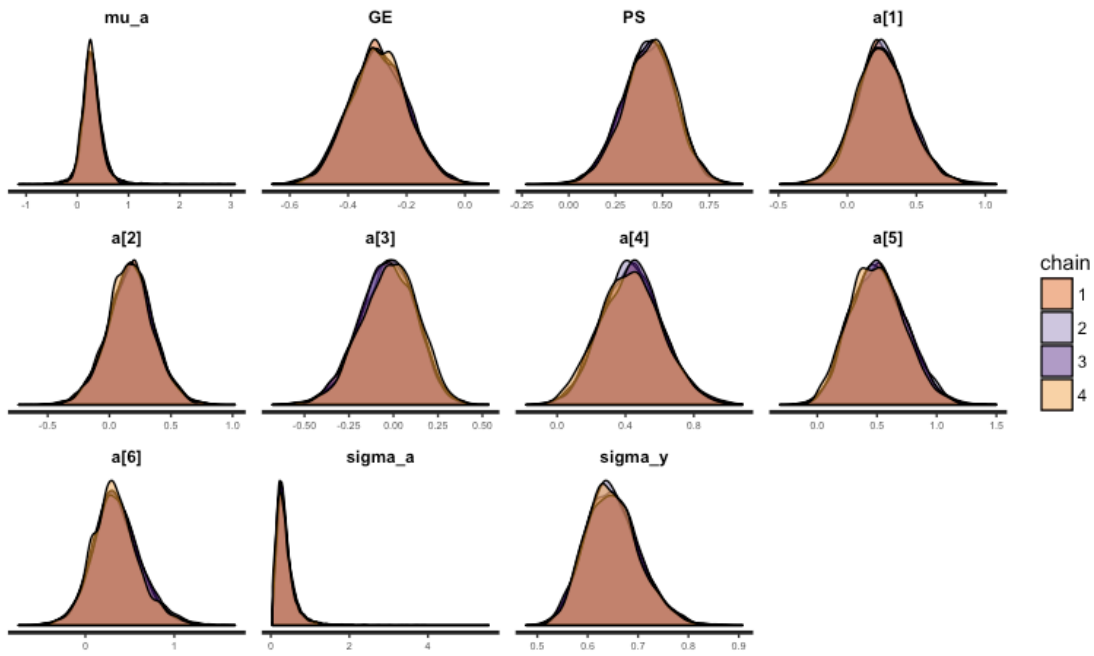

## Conformity 2

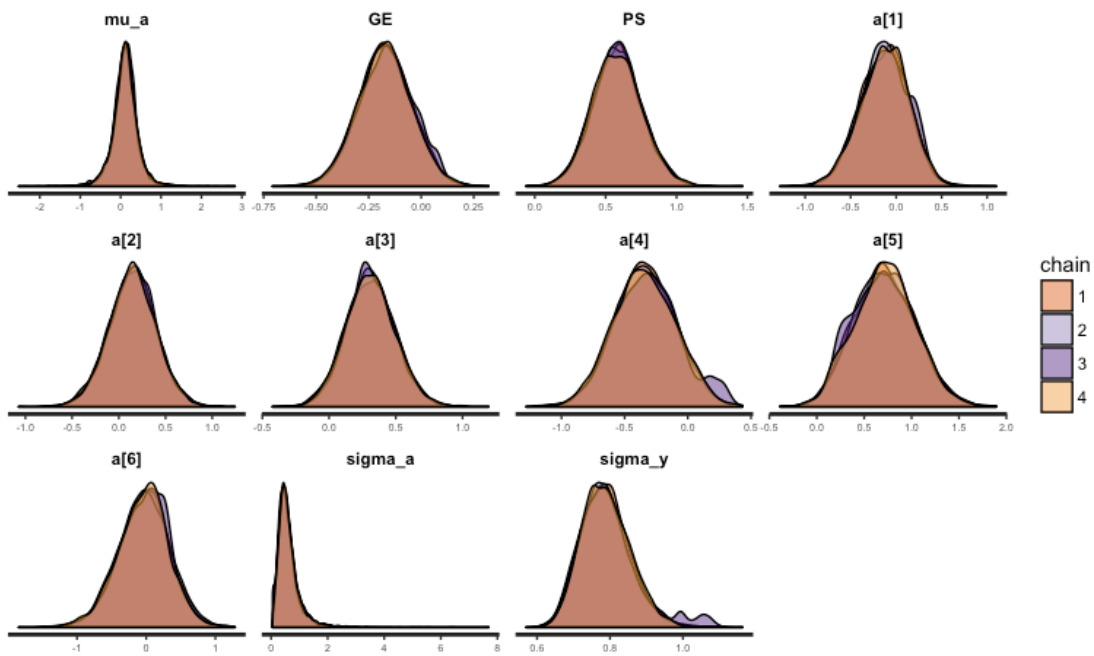

## Conformity 3

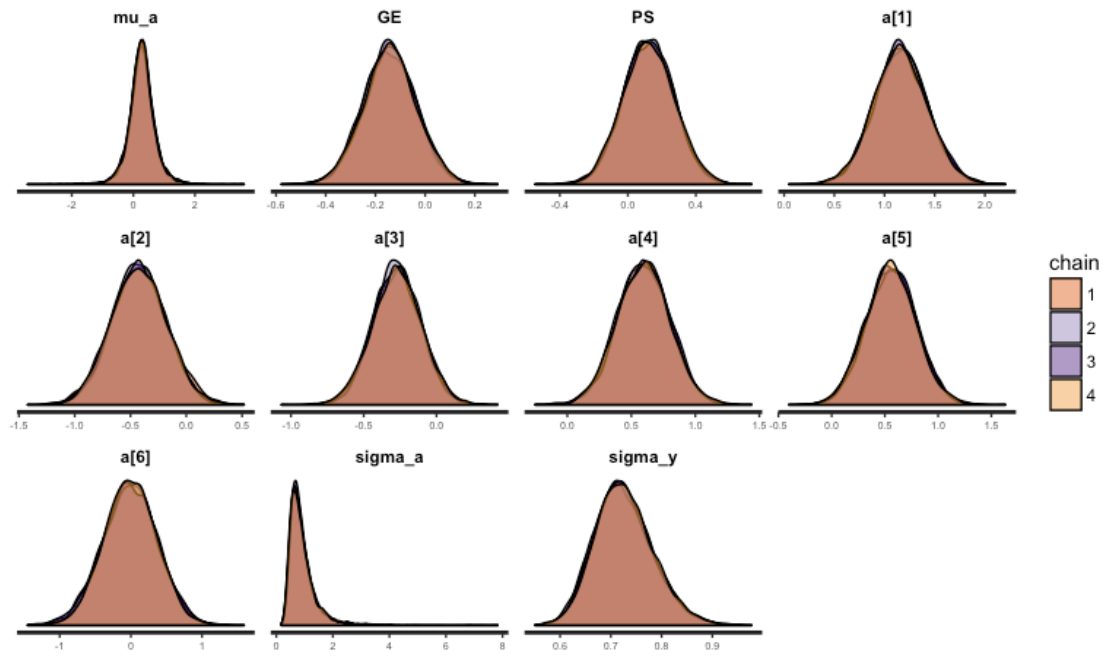

## Conformity 4

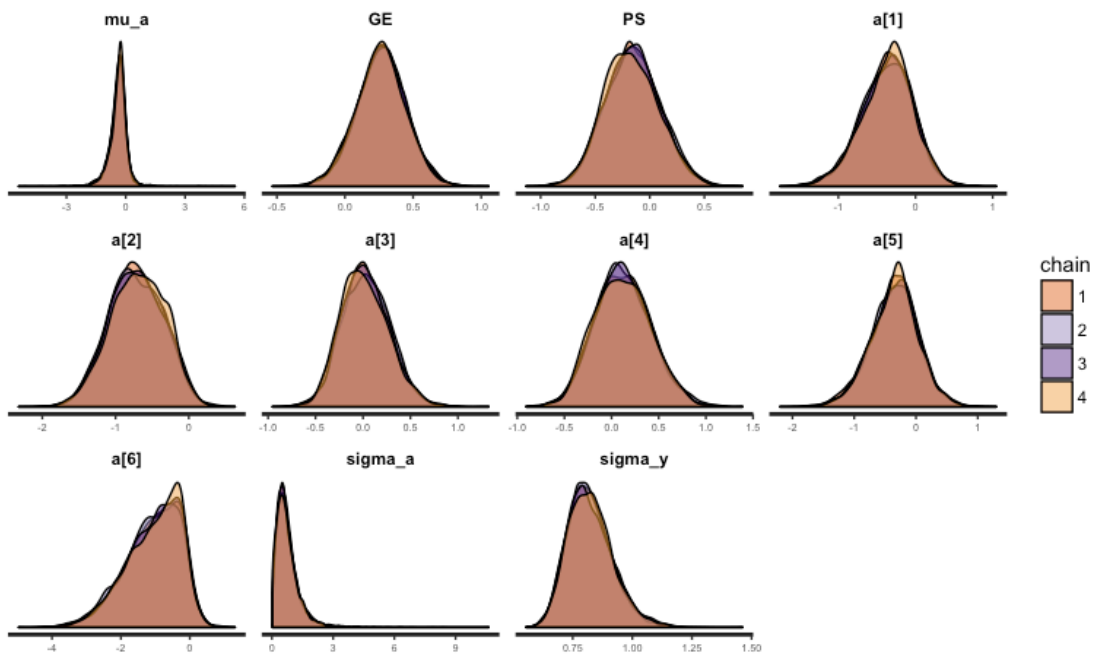

## Model 3

Labels in the top of each graph represent types of parameter:  $\mu_a = \mu_a$ ,  $\mu_{GE} = \mu_{GE}$ ,  $\mu_{PS} = \mu_{PS}$ ,  $a[j] = a_j$ ,  $GE[j] = GE_j$ ,  $PS[j] = PS_j$ ,  $\sigma_a = \sigma_a$ ,  $\sigma_{GE} = \sigma_{GE}$ ,  $\sigma_{PS} = \sigma_{PS}$ , and  $\sigma_y = \sigma_y$ . Subscript numbers under  $a$ ,  $GE$ , and  $PS$  represent global regions (1: Sub-Saharan Africa, 2 East Asia and Pacific, 3: Europe and Central Asia, 4: Latin America and Caribbean, 5: Middle East and North Africa, and 6: South Asia).

## Individualism

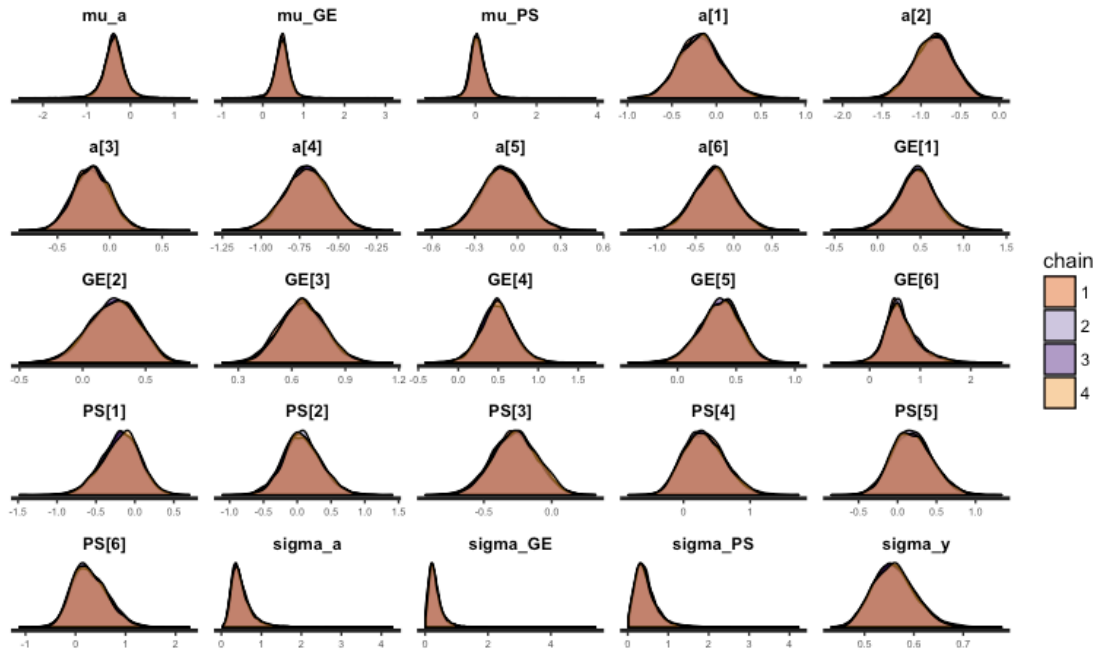

## Conformity 1

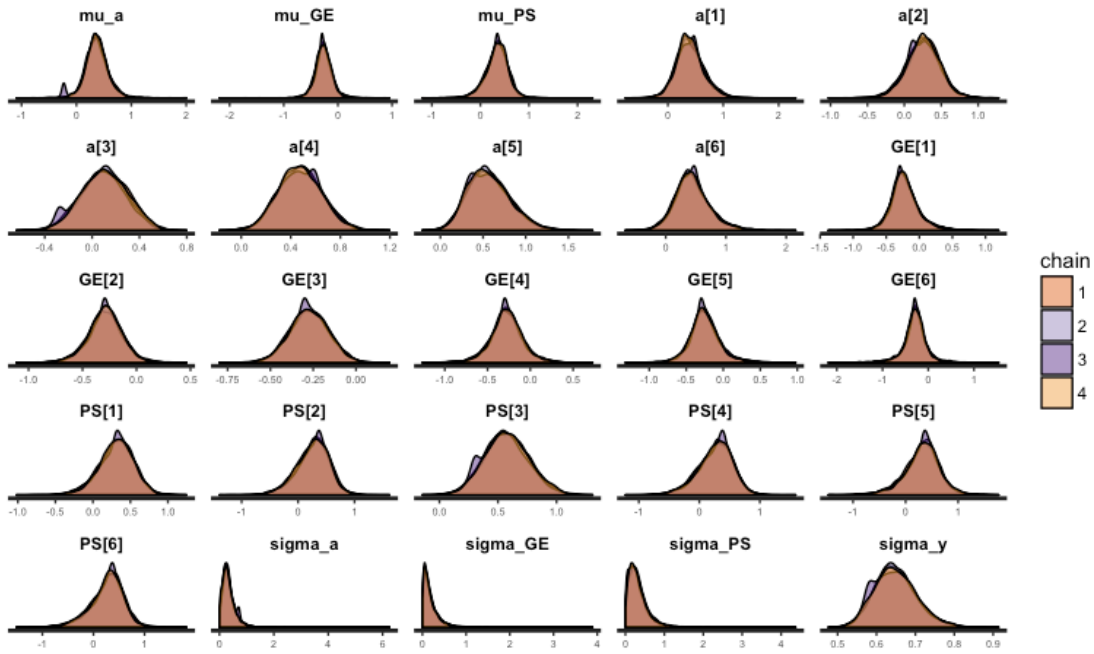

## Conformity 2

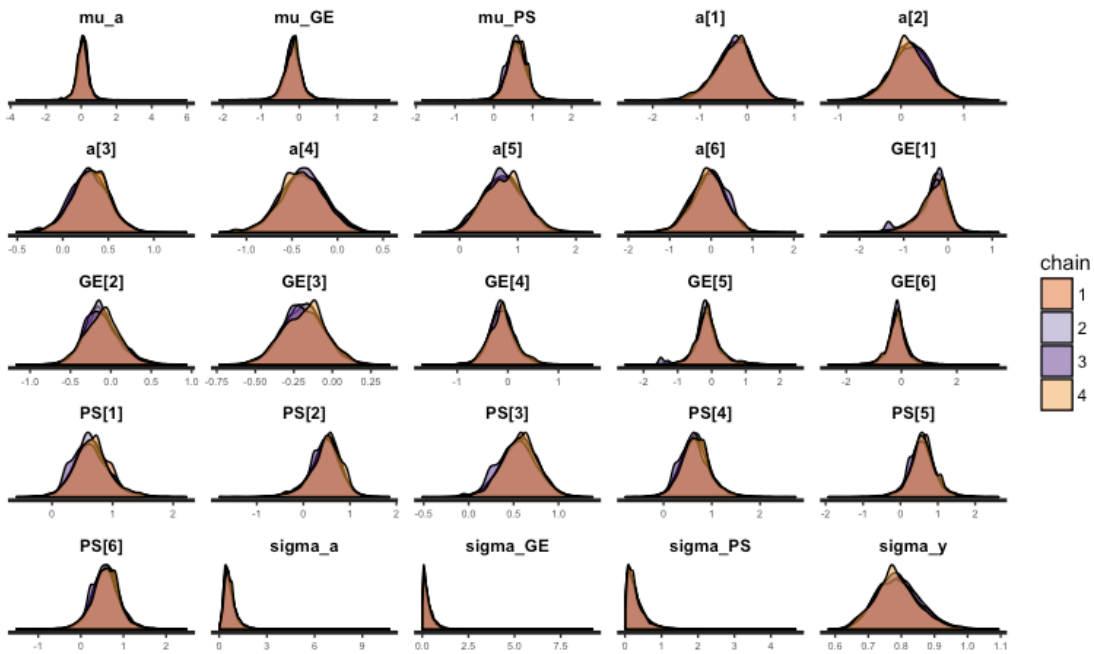

## Conformity 3

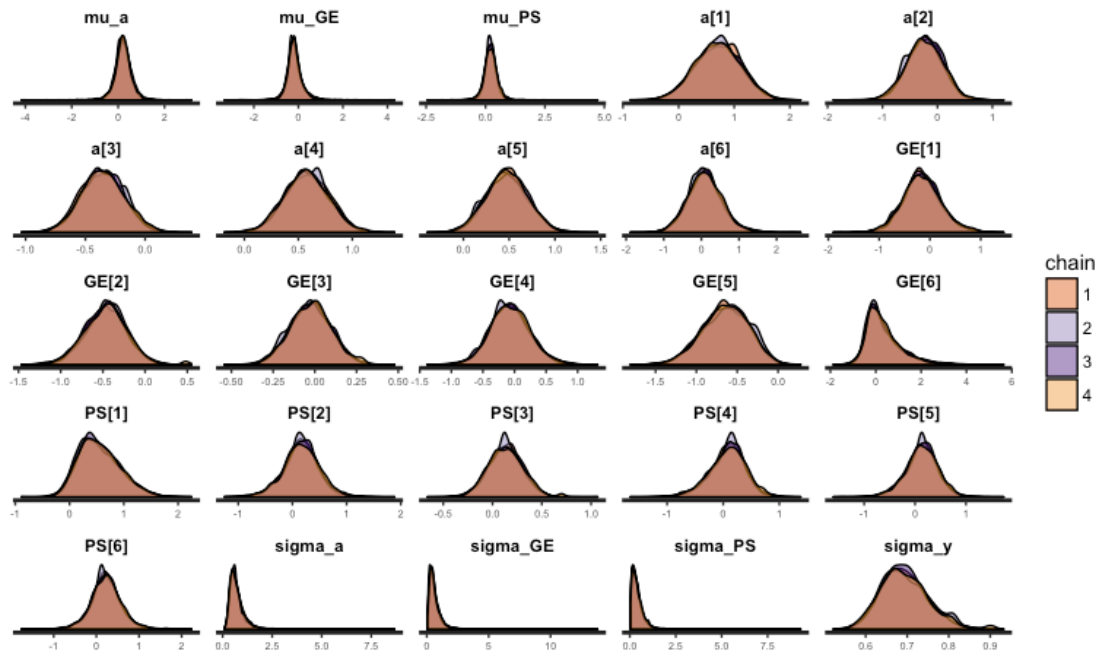

## Conformity 4

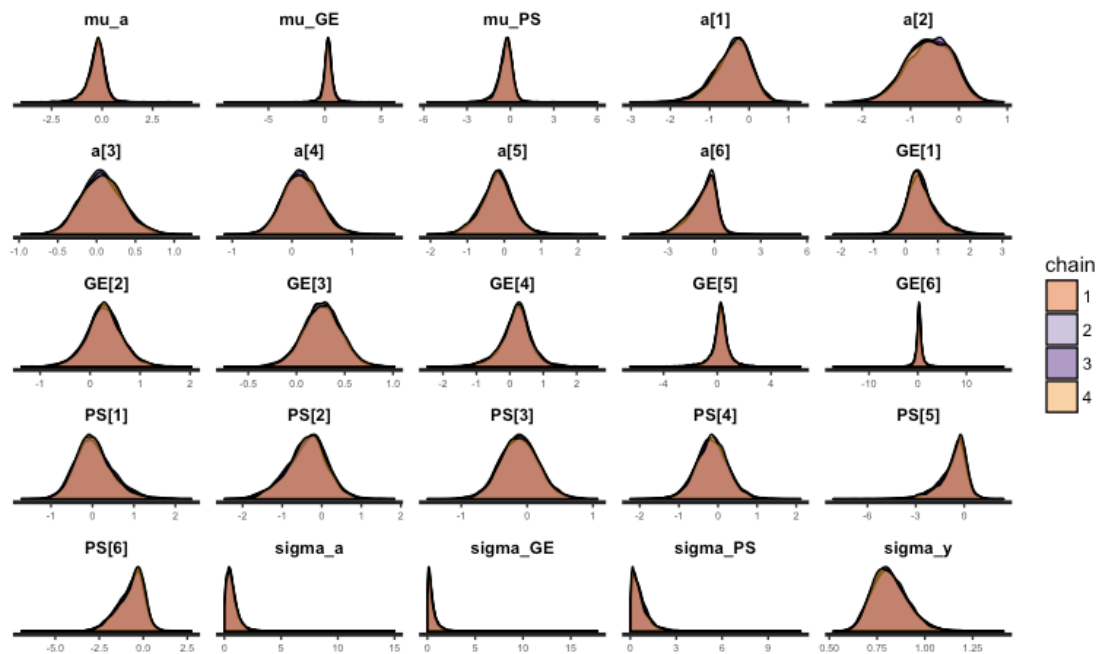

## Results of each model when GDP per capita was used as an independent variable

### Model 1

Labels in the top of each graph represent types of parameter:  $a_0 = a_0$ ,  $GDP = GDP$ ,  $PS = PS$ ,  $\sigma_y = \sigma_y$ .

#### Individualism

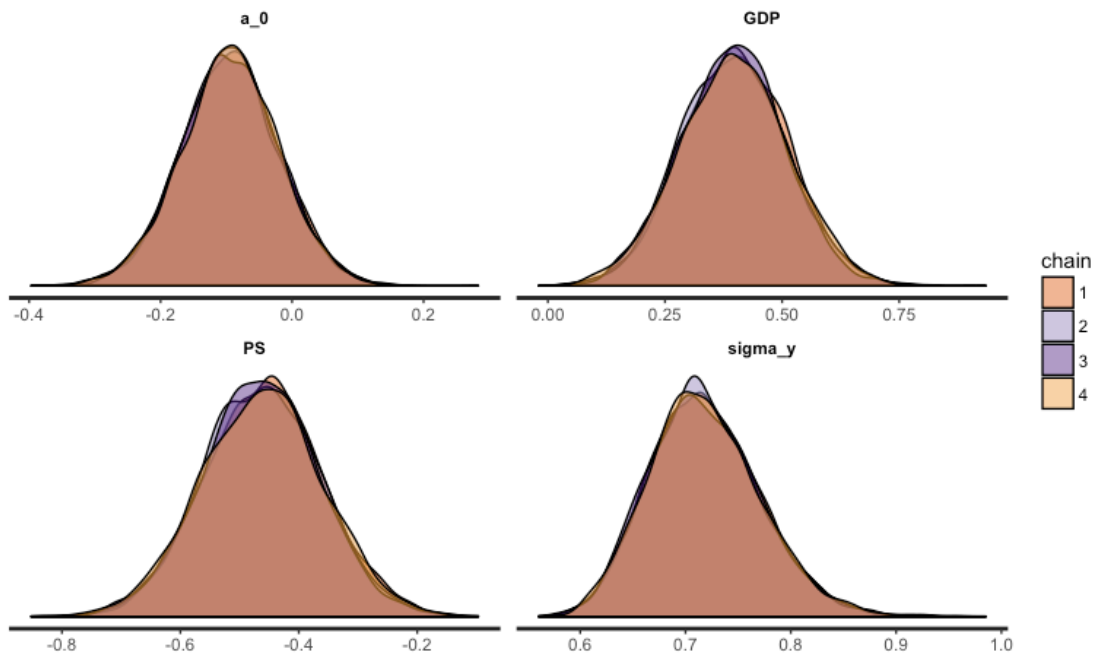

## Conformity 1

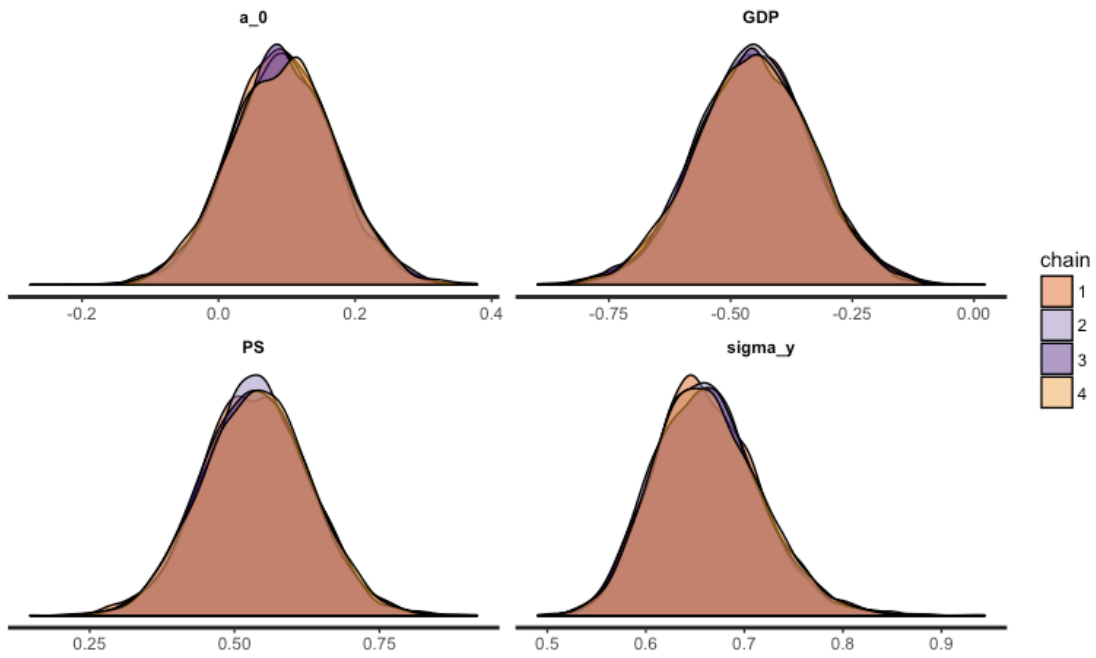

## Conformity 2

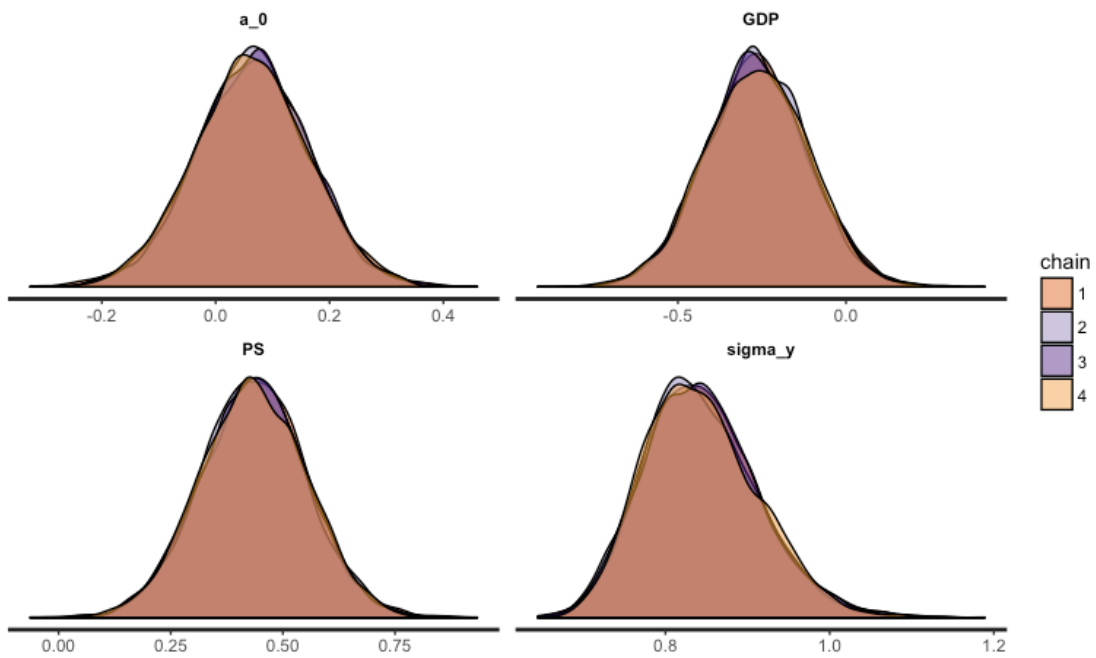

### Conformity 3

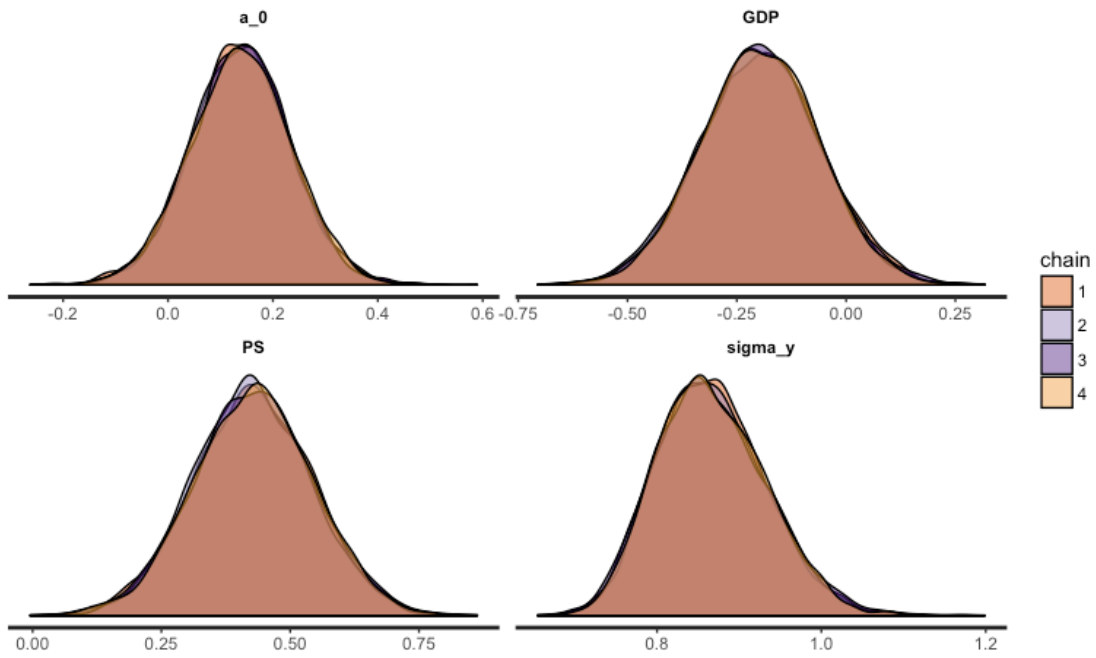

### Conformity 4

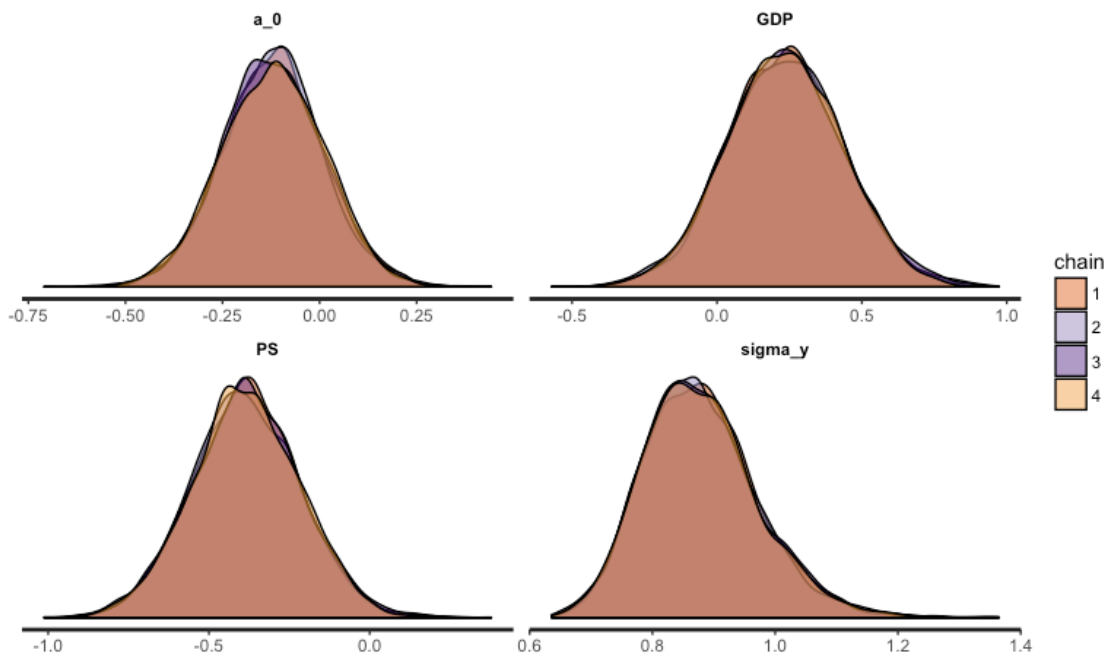

## Model 2

Labels in the top of each graph represent types of parameter:  $\mu_a = \mu_a$ ,  $GDP = GDP$ ,  $PS = PS$ ,  $a[j] = a_j$ ,  $\sigma_a = \sigma_a$ ,  $\sigma_y = \sigma_y$ . Subscript numbers under  $a$  represent global regions (1: Sub-Saharan Africa, 2 East Asia and Pacific, 3: Europe and Central Asia, 4: Latin America and Caribbean, 5: Middle East and North Africa, and 6: South Asia).

### Individualism

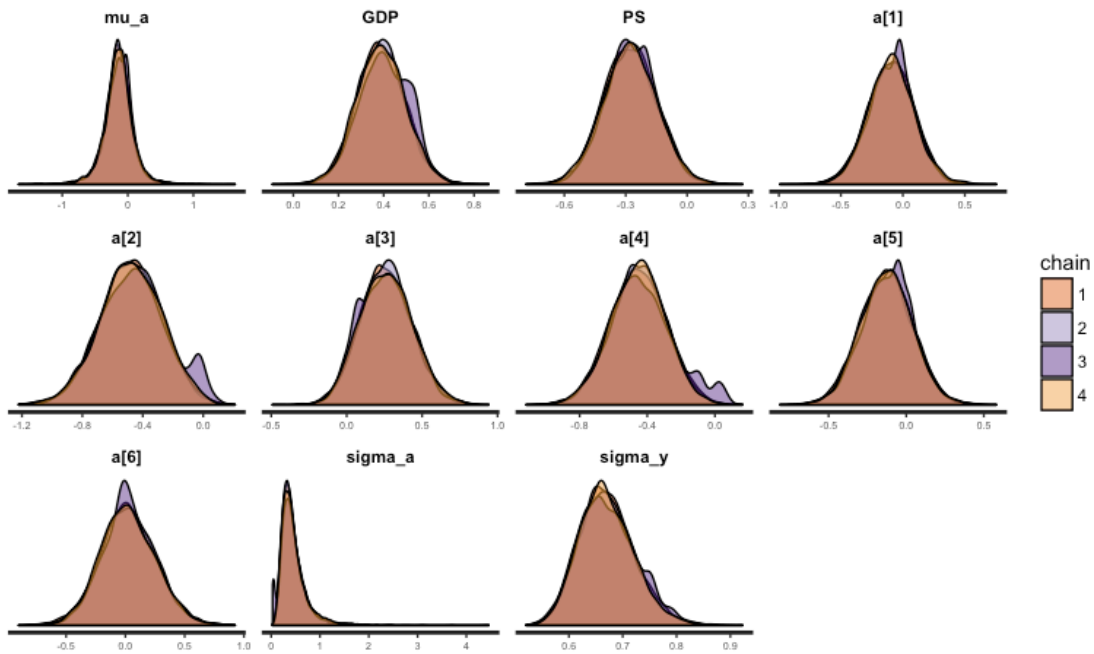

## Conformity 1

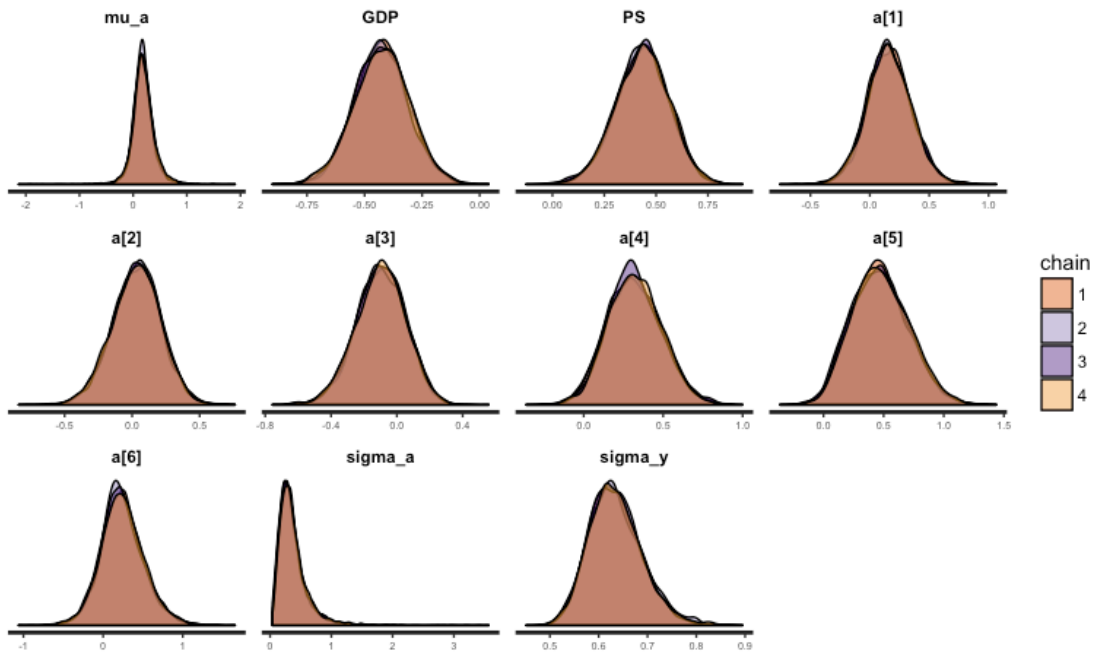

## Conformity 2

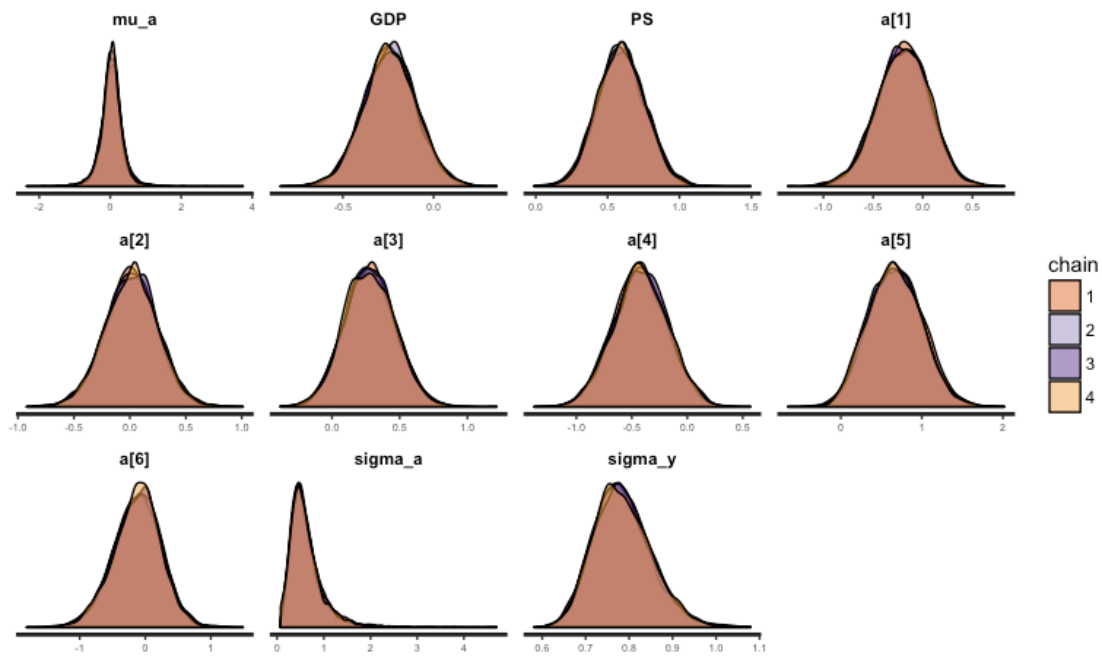

## Conformity 3

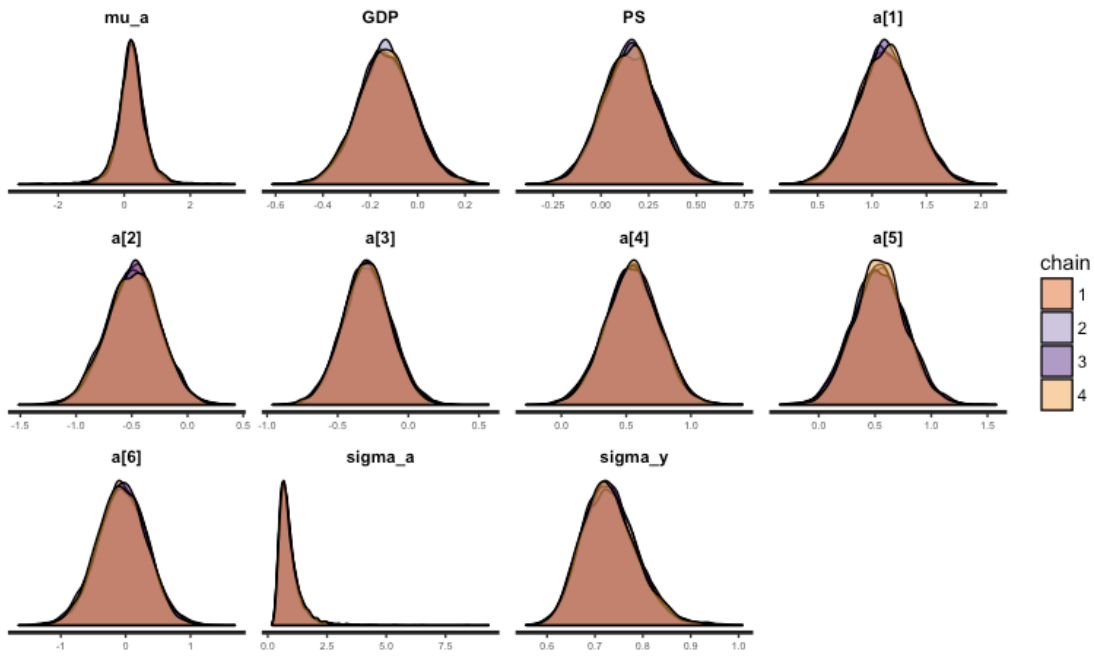

## Conformity 4

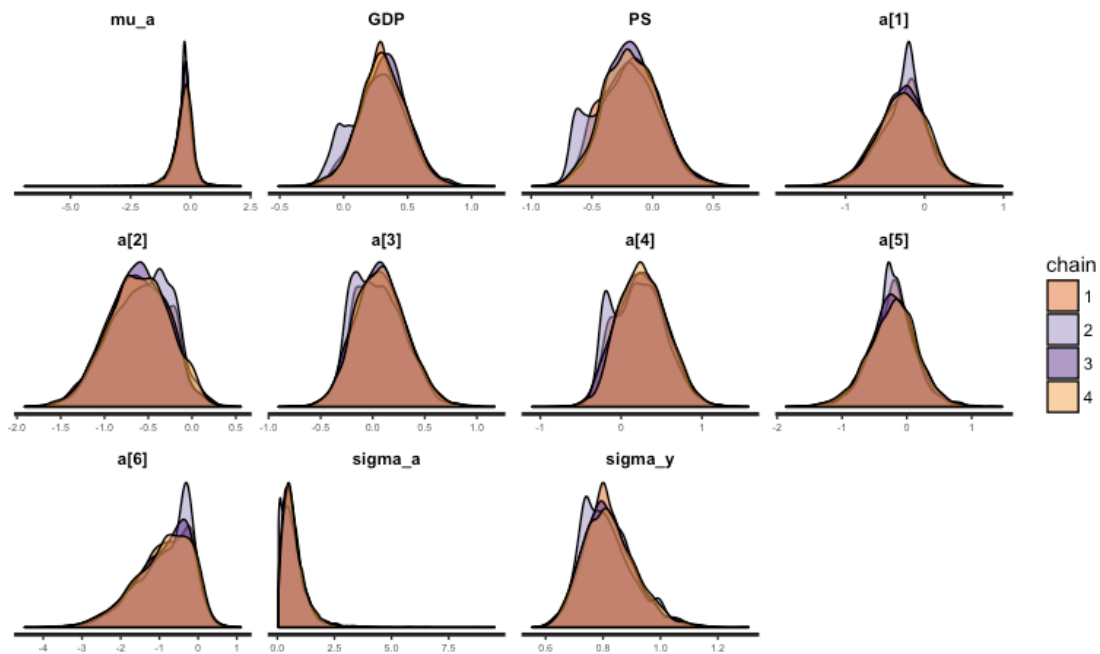

## Model 3

Labels in the top of each graph represent types of parameter:  $\mu_a = \mu_a$ ,  $\mu_{GDP} = \mu_{GDP}$ ,  $\mu_{PS} = \mu_{PS}$ ,  $a[j] = a_j$ ,  $GDP[j] = GDP_j$ ,  $PS[j] = PS_j$ ,  $\sigma_a = \sigma_a$ ,  $\sigma_{GDP} = \sigma_{GDP}$ ,  $\sigma_{PS} = \sigma_{PS}$ , and  $\sigma_y = \sigma_y$ . Subscript numbers under  $a$ ,  $GDP$ , and  $PS$  represent global regions (1: Sub-Saharan Africa, 2 East Asia and Pacific, 3: Europe and Central Asia, 4: Latin America and Caribbean, 5: Middle East and North Africa, and 6: South Asia).

## Individualism

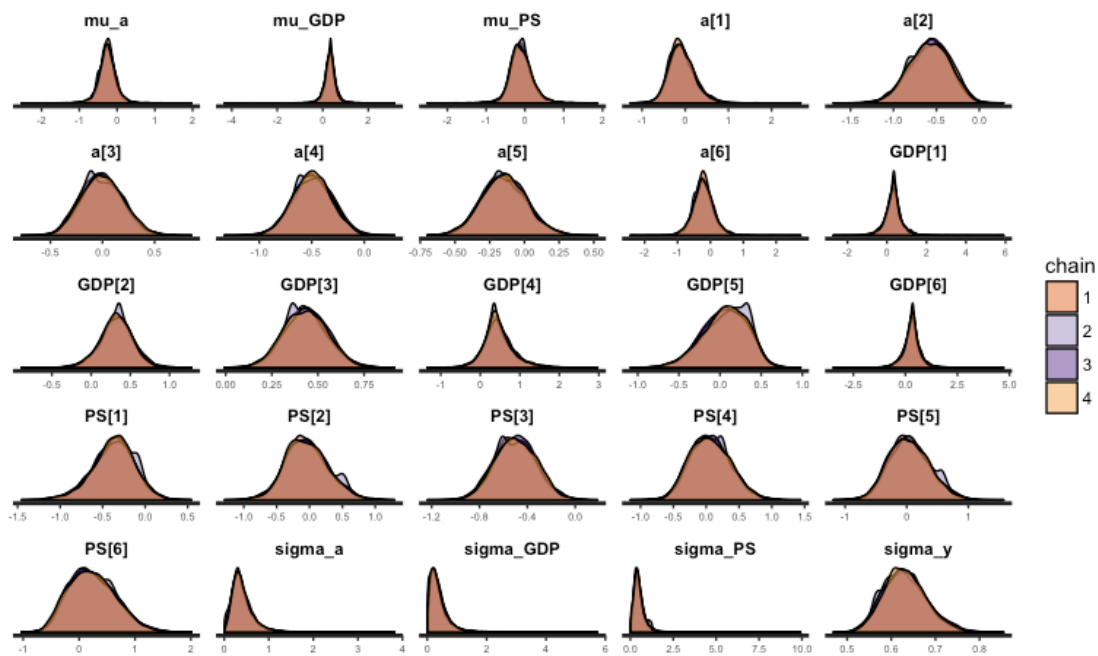

## Conformity 1

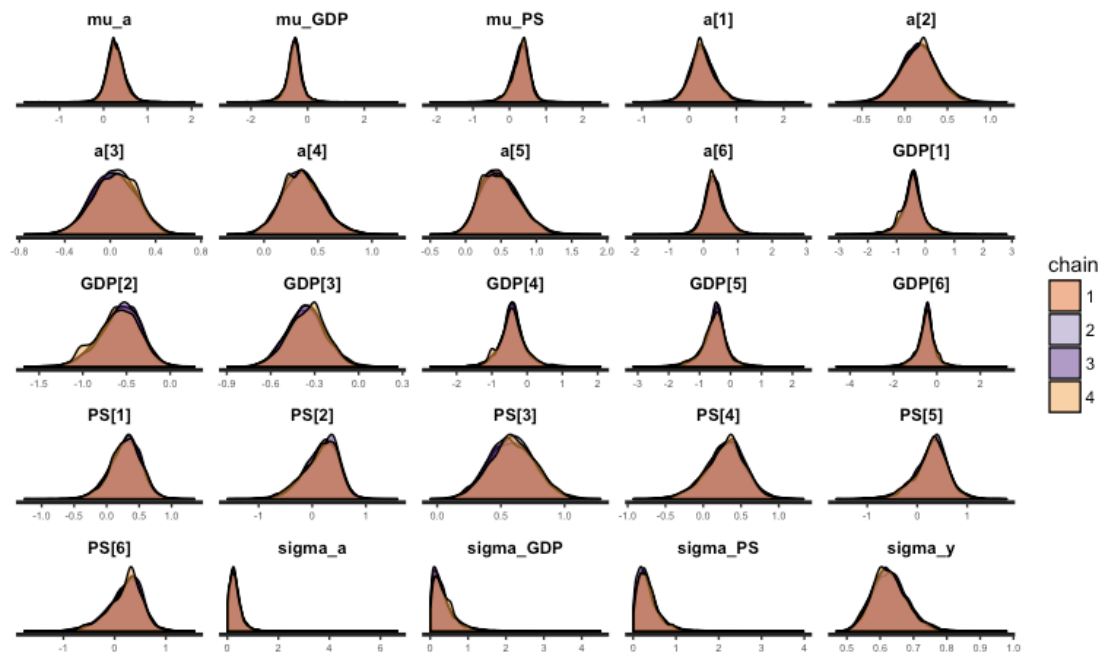

## Conformity 2

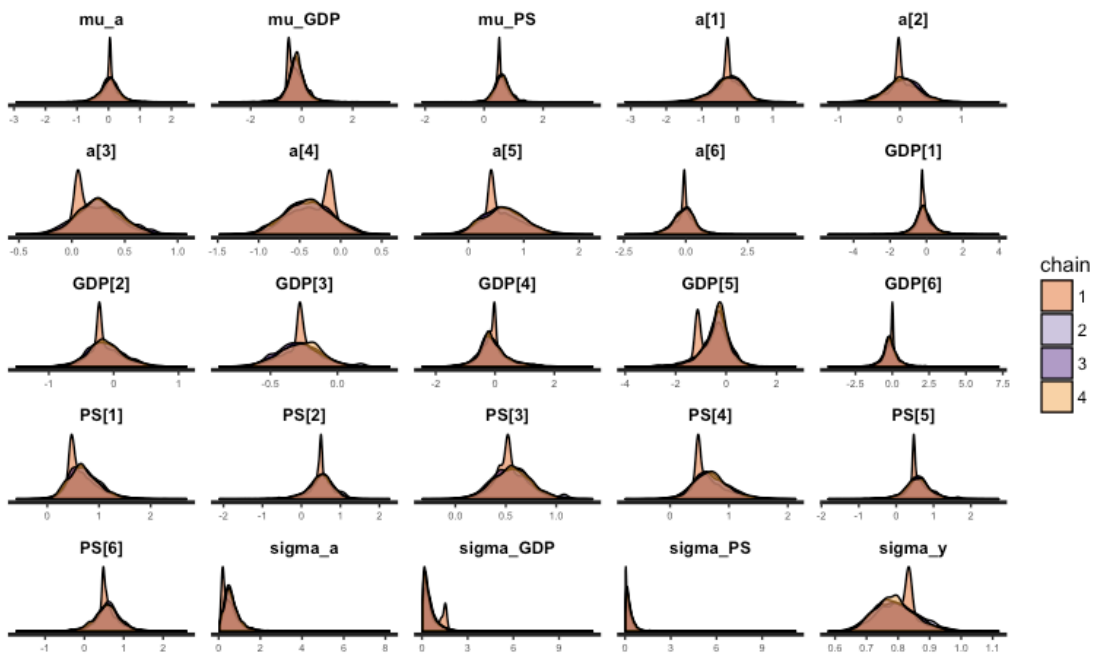

## Conformity 3

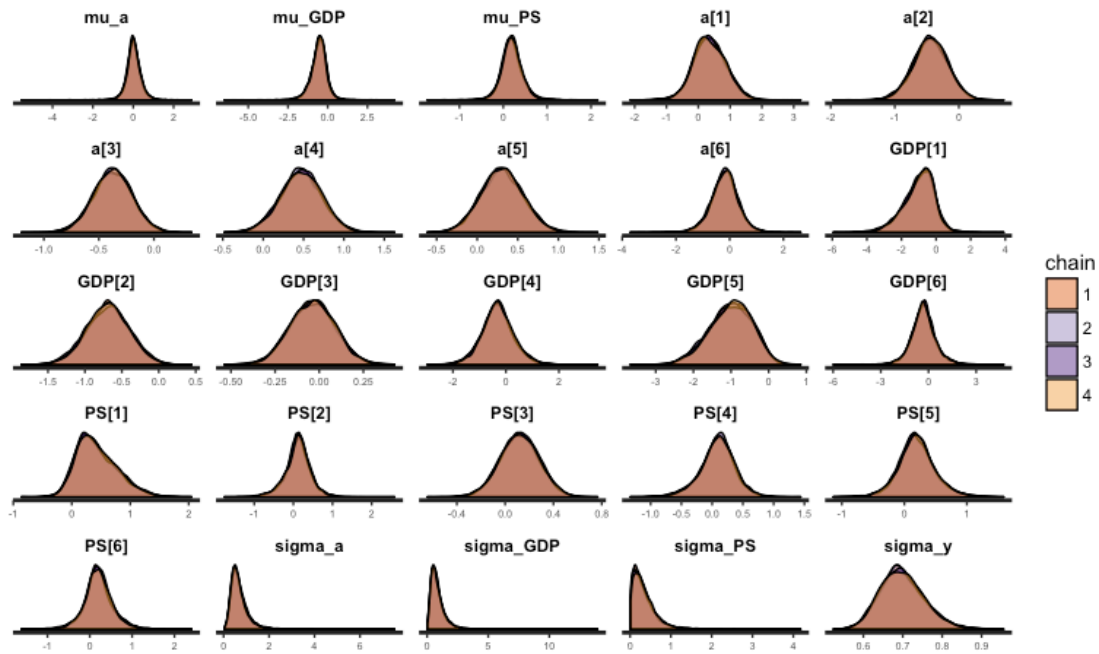

## Conformity 4

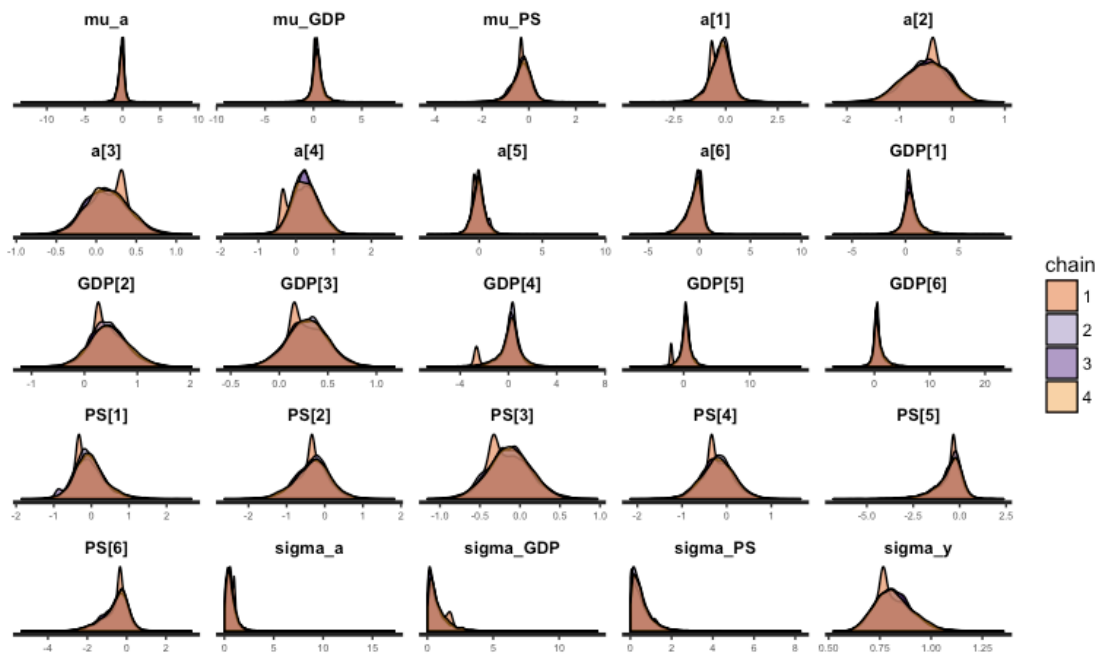

Supplement: Supplementary file [file 13248110]
